# Supplementary material for: Energy transfer luminescence of Tb3+ ion complexed with calix[4]arenetetrasulfonate and the thia and sulfonyl analogue. The effect of bridging groupsElectronic supplementary information (ESI) available: emission spectra of Sm3+ and Dy3+ ions complexed with 2; emission spectra of Sm3+, Eu3+ and Dy3+ complexed with 3; continuous variation curves for the Tb3+ complexes with 2 and 3. See http://www.rsc.org/suppdata/p2/b0/b009151k/
Source: Royal Society of Chemistry journal article supplement (doi:10.1039/b009151k), 2001-10-15
Supplement: b009151k.pdf [file b009151k.pdf]

## Supplementary Material

### Energy Transfer Luminescence of Tb<sup>3+</sup> Ion Complexed with Calix[4]arenetetrasulfonate and the Thia and Sulfonyl Analogue. The Effect of Bridging Groups

Nobuhiko Iki,<sup>\*a</sup> Takayuki Horiuchi,<sup>a</sup> Hiromi Oka,<sup>a</sup> Katsuyoshi Koyama,<sup>a</sup>  
Naoya Morohashi,<sup>a</sup> Chizuko Kabuto,<sup>b</sup> and Sotaro Miyano<sup>\*a</sup>

<sup>a</sup> Department of Biomolecular Engineering, Graduate School of Engineering,  
Tohoku University, Aramaki-Aoba 07, Sendai 980-8579, Japan

<sup>b</sup> Instrumental Analysis Center for Chemistry, Graduate School of Science, Tohoku University,  
Aramaki-Aoba, Aoba-ku, Sendai 980-8578, Japan

#### CONTENTS

Fig. S1 Emission spectra of (a) Sm<sup>3+</sup> and (b) Dy<sup>3+</sup> ions complexed with **2**.

Fig. S2 Emission spectra of (a) Sm<sup>3+</sup>, (b) Eu<sup>3+</sup>, and (c) Dy<sup>3+</sup> ions complexed with **3**.

Fig. S3. Continuous variation curves for the Tb<sup>3+</sup> complexes with calix[4]arenetetrasulfonates **2** and **3**.

\* To whom correspondence should be addressed.

E-mail: iki@orgsynth.che.tohoku.ac.jp, miyano@orgsynth.che.tohoku.ac.jp

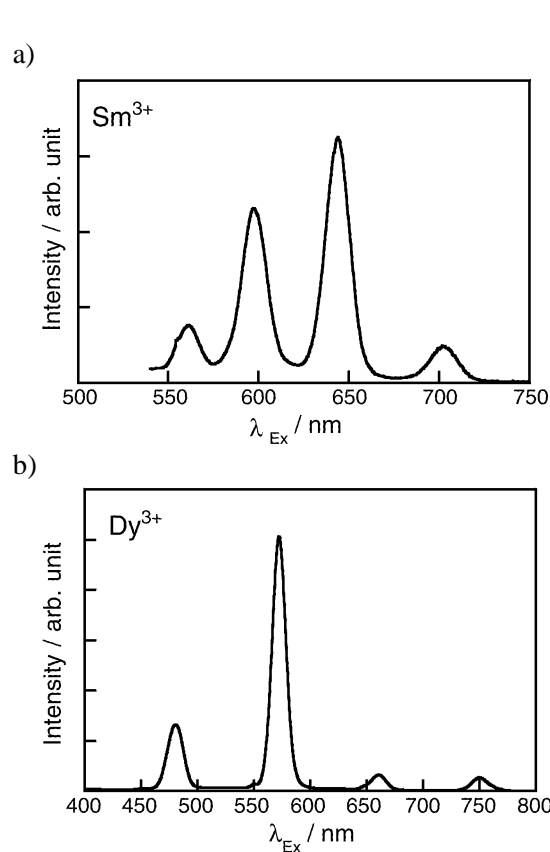

**Fig. S1** Emission spectra of (a)  $\text{Sm}^{3+}$  and (b)  $\text{Dy}^{3+}$  ions complexed with **2**. (a)  $[\text{Sm}^{3+}] = 2.0 \times 10^{-6} \text{ M}$ ,  $[\text{2}] = 4.0 \times 10^{-6} \text{ M}$ ,  $[\text{buffer}] = 5 \text{ mM}$ ,  $\text{pH} = 9.3$ , (b)  $[\text{Dy}^{3+}] = 2.0 \times 10^{-6} \text{ M}$ ,  $[\text{2}] = 4.0 \times 10^{-6} \text{ M}$ ,  $[\text{buffer}] = 5 \text{ mM}$ ,  $\text{pH} = 8.5$ . In each case,  $\lambda_{\text{Ex}} = 313 \text{ nm}$ , excitation and emission slit width: 10 nm.

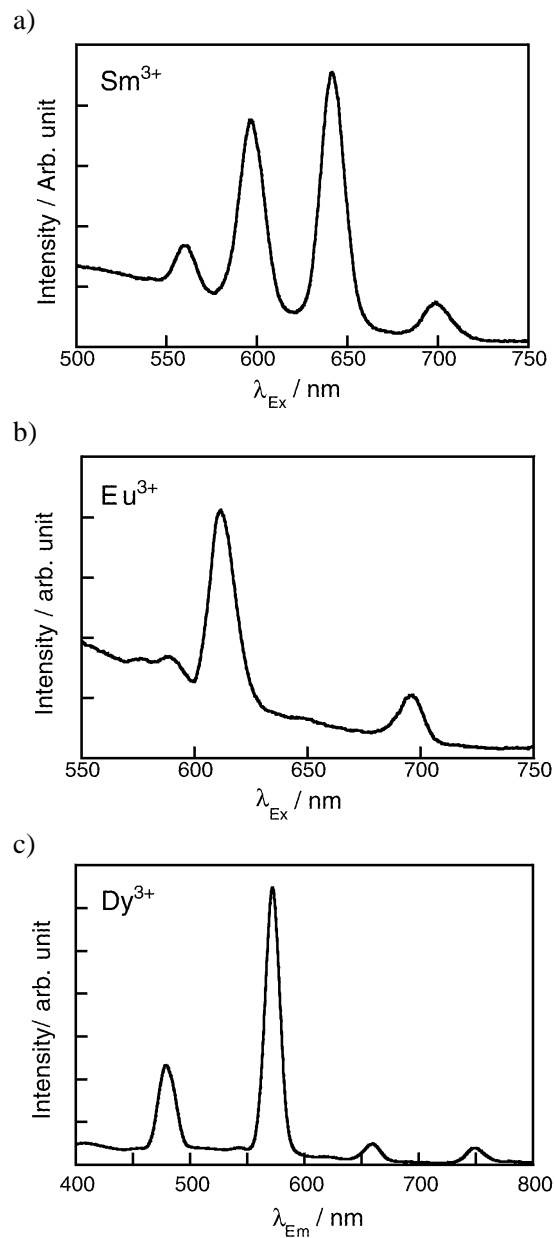

**Fig. S2** Emission spectra of (a)  $\text{Sm}^{3+}$ , (b)  $\text{Eu}^{3+}$ , and (c)  $\text{Dy}^{3+}$  ions complexed with **3**. (a)  $[\text{Sm}^{3+}] = 2.0 \times 10^{-6} \text{ M}$ ,  $[\text{3}] = 4.0 \times 10^{-6} \text{ M}$ ,  $[\text{buffer}] = 5 \text{ mM}$ ,  $\text{pH} = 5.5$ , (b)  $[\text{Eu}^{3+}] = 2.0 \times 10^{-6} \text{ M}$ ,  $[\text{3}] = 4.0 \times 10^{-6} \text{ M}$ ,  $[\text{buffer}] = 1 \text{ mM}$ ,  $\text{pH} = 5.5$ , (c)  $[\text{Dy}^{3+}] = 2.0 \times 10^{-6} \text{ M}$ ,  $[\text{3}] = 4.0 \times 10^{-6} \text{ M}$ ,  $[\text{buffer}] = 1 \text{ mM}$ ,  $\text{pH} = 5.5$ . In each case,  $\lambda_{\text{Ex}} = 331 \text{ nm}$ , excitation and emission slit width: 10 nm.

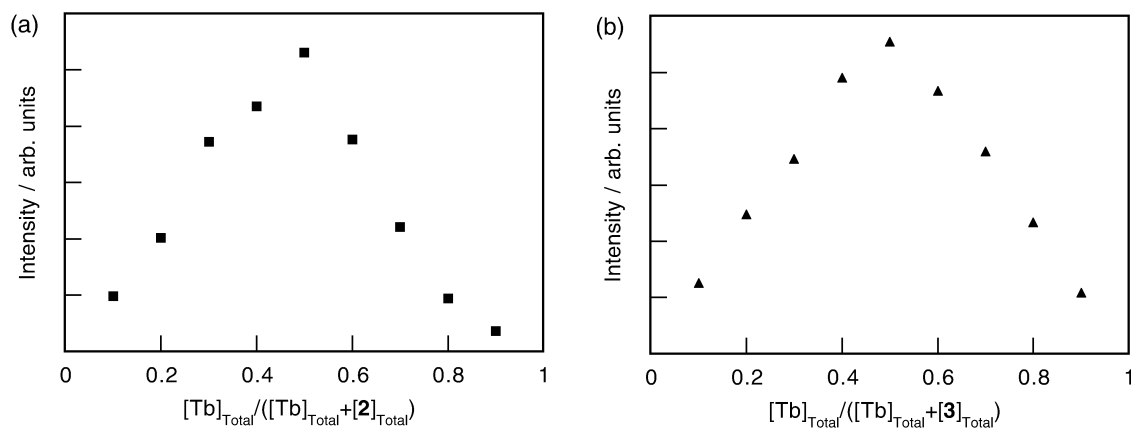

**Fig. S3.** Continuous variation curves for the Tb<sup>3+</sup> complexes with calix[4]arenetetrasulfonates **2** and **3**.  $[\text{Tb}^{3+}]_{\text{Total}} + [\text{L}]_{\text{Total}} = 8.0 \times 10^{-7}$  M, (a) L = **2** at pH 9.0,  $\lambda_{\text{Ex}} = 261$  nm. (b) L = **3**, at pH 5.0,  $\lambda_{\text{Ex}} = 330$  nm.
